# Supplementary material
Source: PubMed Central journal article supplement (PMC5107129)
Supplement: NIHMS803295-supplement-suppl.pdf [file NIHMS803295-supplement-suppl.pdf]

Supplemental Table 1. Hazard ratios Cox proportional hazard models of CEC and survival in angiographic cohort, adjusting for HDL, LDL, history of ischemic heart disease, and various immunosuppressive regimens.

| Immunosuppressive             | HR for CEC (95% CI) | p value for CEC |
|-------------------------------|---------------------|-----------------|
| None included                 | 0.26 (0.11-0.63)    | 0.002           |
| Cyclosporine                  | 0.30 (0.14-0.73)    | 0.007           |
| Tacrolimus                    | 0.30 (0.12-0.71)    | 0.007           |
| MMF                           | 0.26 (0.11-0.63)    | 0.003           |
| Azathioprine                  | 0.25 (0.1-0.6)      | 0.002           |
| Rapamycin                     | 0.28 (0.12-0.67)    | 0.004           |
| Prednisone                    | 0.21 (0.08-0.53)    | 0.001           |
| Cyclosporine, Prednisone      | 0.24 (0.08-0.70)    | 0.009           |
| Cyclosporine, MMF, Prednisone | 0.24 (0.08-0.70)    | 0.009           |
| Tacrolimus, MMF, Prednisone   | 0.24 (0.08-0.70)    | 0.009           |
| Cyclosporine, rapamycin       | 0.31 (0.13-0.74)    | 0.009           |
| Tacrolimus, rapamycin         | 0.31 (0.13-0.74)    | 0.009           |
